# Supplementary material for: Power dependent photoacoustic and photoluminescence studies on a Ho3+/Yb3+ doped Y2O3 phosphor
Source: Royal Society of Chemistry journal article supplement (doi:10.1039/d3ra00643c), 2023-01-01
Supplement: d3ra00643c1.pdf [file d3ra00643c1.pdf]

## Power dependent photoacoustic and photoluminescence studies on $\text{Ho}^{3+}/\text{Yb}^{3+}$ doped $\text{Y}_2\text{O}_3$ phosphor

Minarul I. Sarkar<sup>1</sup>, and Kaushal Kumar<sup>1\*</sup>

<sup>1</sup>Optical Materials & Bio-Imaging Research Laboratory, Department of Physics,  
Indian Institute of Technology (Indian School of Mines) Dhanbad, Dhanbad-826004, India

\*Corresponding author: [kkumar@iitism.ac.in](mailto:kkumar@iitism.ac.in)

### Supplementary Material

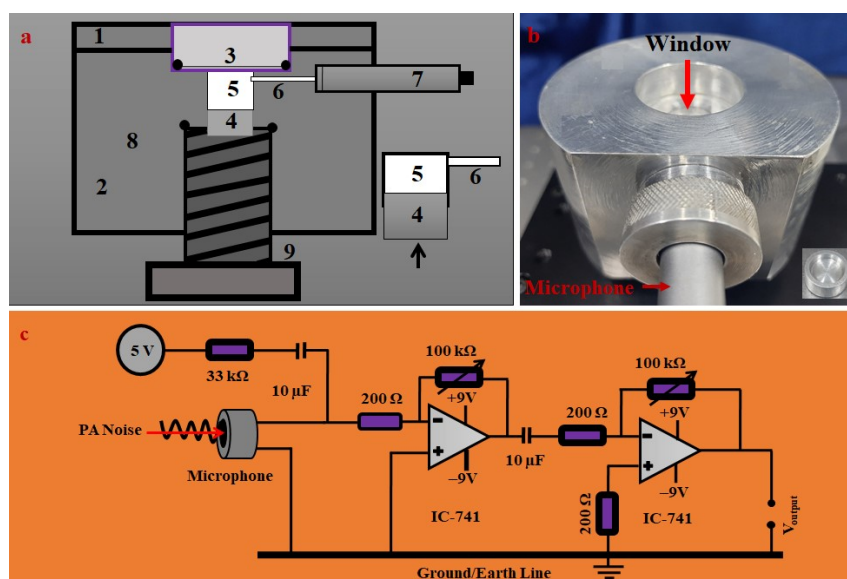

**Fig. S1** (a) Schematic diagram of PA cell 1. Covering plate, 2. Main cell block, 3. Quartz window, 4. Sample holder, 5. Sample chamber, 6. Channel, 7. Microphone, 8. O-ring, 9. Back metal screw, (b) Home-made PA cell and sample holder, and (c) Pre-amplifier circuit.

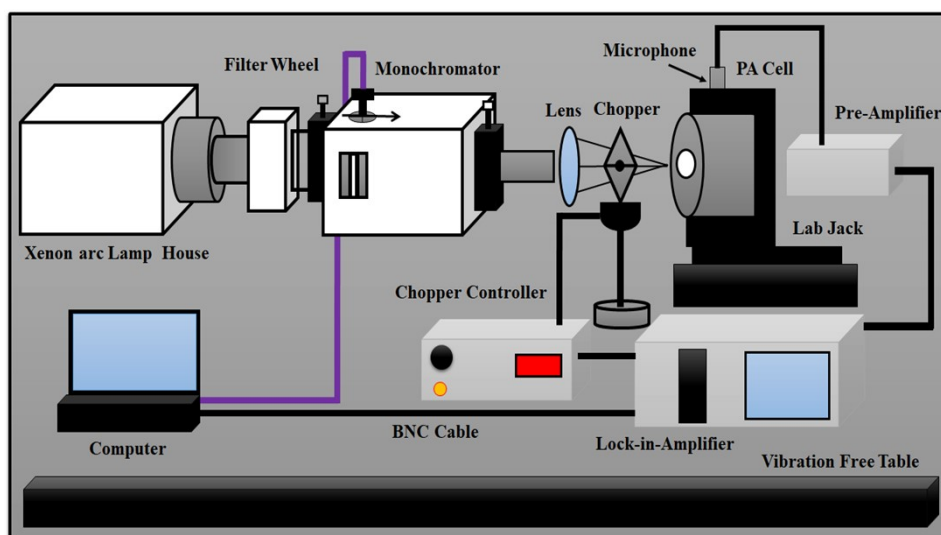

**Fig. S2** Experimental setup for recording of wavelength dependent PA absorption spectra.

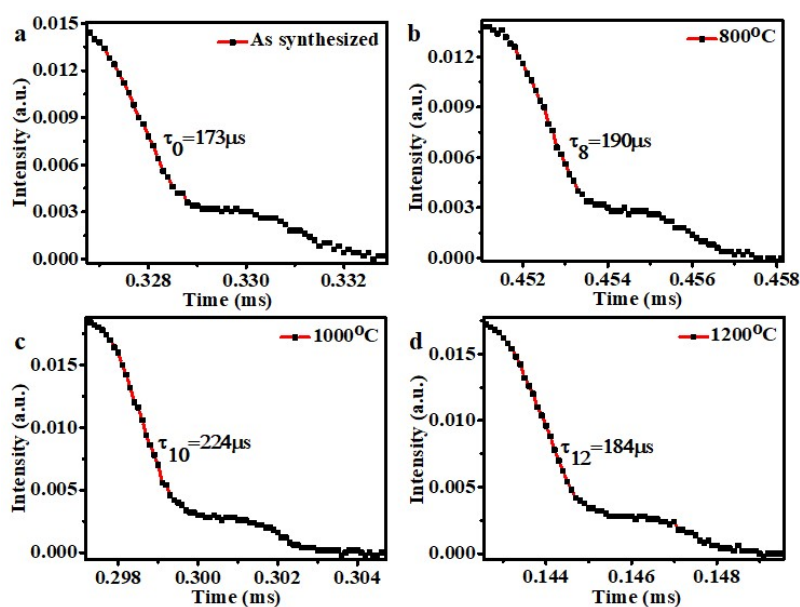

**Fig. S3** luminescence decay curve of the sample for the bands ( $^5S_2 \rightarrow ^5I_8$ ) at 551 nm (a) as synthesized, (b) annealed at 800 °C, (c) annealed at 1000 °C, and (d) annealed at 1200 °C.
